# Supplementary material for: Detecting DNA Modifications from SMRT Sequencing Data by Modeling Sequence Context Dependence of Polymerase Kinetic
Source: PubMed Central journal article supplement (PMC3597545; doi:10.1371/journal.pcbi.1002935), 2013-03-14
Supplement: pcbi.1002935.s002.pdf [file pcbi.1002935.s002.pdf]

# Detecting DNA modifications from SMRT sequencing data by modeling sequence context dependence of polymerase kinetic

Zhixing Feng<sup>1,4</sup>, Gang Fang<sup>2</sup>, Jonas Korlach<sup>3</sup>, Tyson Clark<sup>3</sup>, Khai Luong<sup>3</sup>, Xuegong Zhang<sup>1</sup>, Wing Wong<sup>4,\*</sup>, and Eric Schadt<sup>3,5,\*</sup>

<sup>1</sup>Tsinghua National Laboratory for Information Science and Technology, and Department of Automation, Tsinghua University, Beijing 100084, China; <sup>2</sup>Department of Computer Science and Engineering, University of Minnesota, Minneapolis, MN 55455; <sup>3</sup>Pacific Biosciences, 1380 Willow Road, Menlo Park, CA 94025; <sup>4</sup>Department of Statistics, Stanford University, Stanford, CA 94305; <sup>5</sup>Department of Genetics and Genomics Sciences, Mount Sinai School of Medicine, New York, NY 10029; \*Correspondence: whwong@stanford.edu, eric.schadt@mssm.edu

## Text S1

### Hyperparameters estimation for alternative model

In this section, we explain how to estimate hyperparameters by assuming control sample is available. As hierarchical model without control data is basically a special case of hierarchical model with control data, one can simply remove  $y_0$ ,  $\mu_0$  and  $\sigma_0^2$  to get hyperparameter estimation when control sample is not available, and algorithm is unchanged. When alternative model is true (see section **Hierarchical model with control data** and **Hierarchical model without control data** in the main text), posterior distribution of  $\mu_i$  and  $\sigma_i^2$ ,  $i = 0, 1, \dots, m$ , are[1]

$$p(\mu_i | \mathbf{y}_i, \sigma_i^2, \theta, \kappa) = N\left(\frac{\kappa}{\kappa + n_i}\theta + \frac{n_i}{\kappa + n_i}\bar{y}_i, \frac{\sigma_i^2}{\kappa + n_i}\right)$$
$$p(\sigma_i^2 | \mathbf{y}_i, v, \tau^2) = \text{scaled inverse} - \chi^2(v + n_i, \tilde{\sigma}_i^2)$$

where

$$\tilde{\sigma}_i^2 = \frac{1}{v + n_i} \left( v\tau^2 + (n_i - 1)s_i^2 + \frac{\kappa n_i}{\kappa + n_i} (\bar{y}_i - \theta)^2 \right) \quad (1)$$

$\bar{y}_i = \frac{1}{n_i} \sum_{j=1}^{n_i} y_{ij}$  and  $s_i = \frac{1}{n_i-1} \sum_{j=1}^{n_i} (y_{ij} - \bar{y}_i)^2$ . Posterior distribution of  $\sigma_c^2$  is[1]

$$p(\sigma_c^2 | \mathbf{y}_c, v, \tau^2) = \text{scaled inverse} - \chi^2(v + n_c, \tilde{\sigma}_c^2)$$

where

$$\tilde{\sigma}_c^2 = \frac{1}{v + n_c} \left( v\tau^2 + (n_i - 1)s_c^2 \right)$$

We used posterior expectations of  $\mu_i$  and  $\sigma_i^2$  as their estimations, which are

$$\hat{\mu}_i = E(\mu_i | \mathbf{y}_i, \theta, \kappa) = \frac{\kappa}{\kappa + n_i} \theta + \frac{n_i}{\kappa + n_i} \bar{y}_i \quad (2)$$

where  $i = 0, 1, \dots, m$ .

$$\hat{\sigma}_i^2 = E(\sigma_i^2 | \mathbf{y}_i, v, \tau^2) = \frac{n_i + v}{n_i + v - 2} \tilde{\sigma}_i^2$$

where  $i = c, 0, 1, \dots, m$ . We estimate hyperparameters  $(\theta, \kappa, v, \tau^2, \mu_c)$  from the data by maximizing the marginal log-likelihood function, which is

$$\begin{aligned}
L(\mathbf{y}_c, \mathbf{y}_0, \mathbf{y}_1, \dots, \mathbf{y}_m; \theta, \kappa, v, \tau^2, \mu_c) &= \log(p(\mathbf{y}_c, \mathbf{y}_0, \mathbf{y}_1, \dots, \mathbf{y}_m | \theta, \kappa, v, \tau^2, \mu_c)) \\
&= \log(p(\mathbf{y}_c | \theta, \kappa, v, \tau^2, \mu_c)) \\
&\quad + \sum_{i=0}^m \log(p(\mathbf{y}_i | \theta, \kappa, v, \tau^2))
\end{aligned}$$

where

$$\begin{aligned}
\log(p(\mathbf{y}_c | \theta, \kappa, v, \tau^2, \mu_c)) &= \frac{v}{2} \log(v\tau^2) + \log(\Gamma(\frac{v+n_i}{2})) \\
&\quad - \frac{v+n_i}{2} \log(\sum_{j=1}^{n_c} (y_{cj} - \mu_c)^2 + v\tau^2) - \log(\Gamma(\frac{v}{2})) \\
&\quad - \frac{n_c}{2} \log(\pi) \\
\sum_{i=0}^m \log(p(\mathbf{y}_i | \theta, \kappa, v, \tau^2)) &= \sum_{i=0}^m [\frac{1}{2} \log(\kappa) + \log(\Gamma(\frac{v+n_i}{2})) + \frac{v}{2} \log(v\tau^2) \\
&\quad - \frac{1}{2} \log(\kappa + n_i) - \log(\Gamma(\frac{v}{2})) - \frac{v+n_i}{2} \log((v+n_i)\tilde{\sigma}_i^2) \\
&\quad - \frac{n_i}{2} \log(\pi)]
\end{aligned}$$

It is obvious that  $L(\mathbf{y}_c, \mathbf{y}_0, \mathbf{y}_1, \dots, \mathbf{y}_m; \theta, \kappa, v, \tau^2, \mu_c)$  can be maximized by setting  $\mu_c = \frac{1}{n_c} \sum_{j=1}^{n_c} y_{cj}$ . However, it is difficult to get a close form of  $(\theta, \kappa, v, \tau^2)$  and we therefore adopted a EM algorithm (Algorithm 1) to esti-

mate them numerically.

In the EM procedure,  $\mu_i$  and  $\sigma_i^2$  were regarded as missing data, and the log-likelihood function with the complete data was

$$\begin{aligned}
& l(\mathbf{y}, \mu, \sigma^2; \theta, \kappa, \tau^2, v) \\
&= \log(p(\mathbf{y}|\mu, \sigma^2)) + \log(p(\mu|\sigma^2, \theta, \kappa)) + \log(p(\sigma^2|v, \tau^2)) \\
&= \log(p(\mathbf{y}|\mu, \sigma^2)) + \sum_{i=0}^m \log(p(\mu_i|\sigma_i^2, \theta, \kappa)) + \sum_{i=c,0,1,\dots,m} \log(p(\sigma_i^2|\tau^2, v)) \quad (3)
\end{aligned}$$

where  $\mathbf{y} = (\mathbf{y}_c, \mathbf{y}_0, \mathbf{y}_1, \dots, \mathbf{y}_m)$ ,  $\mu = (\mu_0, \mu_1, \dots, \mu_m)$  and  $\sigma^2 = (\sigma_c^2, \sigma_0^2, \sigma_1^2, \dots, \sigma_m^2)$ .

Initial values  $(\theta_0, \kappa_0, \tau_0^2, v_0)$  were assigned to  $(\theta, \kappa, \tau^2, v)$ , and in the  $t$ th step ( $t \geq 1$ ) of EM algorithm,  $(\theta, \kappa, \tau^2, v)$  were updated by the optimal value  $(\theta_{opt}, \kappa_{opt}, \tau_{opt}^2, v_{opt})$  maximizing  $E(l(\mathbf{y}, \mu, \sigma^2; \theta, \kappa, \tau^2, v) | \mathbf{y}, \theta_{t-1}, \kappa_{t-1}, \tau_{t-1}^2, v_{t-1})$ , where  $E(\cdot)$  is expectation in term of  $(\mu, \sigma^2)$ , i.e.  $\theta_t = \theta_{opt}, \kappa_t = \kappa_{opt}, \tau_t = \tau_{opt}^2, v_t = v_{opt}$ . This procedure was repeated until convergence.

In the  $t$ th step of the EM algorithm,  $(\theta_{opt}, \kappa_{opt})$  and  $(\tau_{opt}^2, v_{opt})$  can be obtained by maximizing posterior expectation of the second term and the third term of equation (3), i.e.  $\sum_{i=0}^m E(\log(p(\mu_i|\sigma_i^2, \theta, \kappa)) | \mathbf{y}, \theta_{t-1}, \kappa_{t-1}, \tau_{t-1}^2, v_{t-1})$  and  $\sum_{i=c,0,1,\dots,m} E(\log(p(\sigma_i^2|\tau^2, v)) | \mathbf{y}, \theta_{t-1}, \kappa_{t-1}, \tau_{t-1}^2, v_{t-1})$ , respectively.

$$\frac{{}^1\Delta l}{E(l(\mathbf{y}, \mu, \sigma^2; \theta_{t-1}, \kappa_{t-1}, \tau_{t-1}^2, v_{t-1}) | \mathbf{y}, \theta_{t-1}, \kappa_{t-1}, \tau_{t-1}^2, v_{t-1})} = \frac{E(l(\mathbf{y}, \mu, \sigma^2; \theta_{opt}, \kappa_{opt}, \tau_{opt}^2, v_{opt}) | \mathbf{y}, \theta_{t-1}, \kappa_{t-1}, \tau_{t-1}^2, v_{t-1})}{E(l(\mathbf{y}, \mu, \sigma^2; \theta_{t-1}, \kappa_{t-1}, \tau_{t-1}^2, v_{t-1}) | \mathbf{y}, \theta_{t-1}, \kappa_{t-1}, \tau_{t-1}^2, v_{t-1})} -$$

---

**Algorithm 1** EM algorithm for hyperparameters estimation

---

Assign initial values to hyperparameters,  $\theta = \theta_0$ ,  $\kappa = \kappa_0$ ,  $v = v_0$  and  $\tau^2 = \tau_0^2$ .

Set  $t = 1$

**while**  $\Delta l \leq 0.1$  <sup>1</sup> **do**

**E-step:** Calculate conditional expectation of log likelihood function in terms of  $\mu_i$  and  $\sigma_i^2$ , i.e.  $E(l(\mathbf{y}, \mu, \sigma^2; \theta, \kappa, \tau^2, v) \mid \mathbf{y}, \theta_{t-1}, \kappa_{t-1}, \tau_{t-1}^2, v_{t-1})$ .

**M-step:** Update  $(\theta, \kappa, v, \tau^2)$  by setting  $\theta_t = \theta_{opt}, \kappa_t = \kappa_{opt}, v_t = v_{opt}, \tau_t = \tau_{opt}^2$ , where  $(\theta_{opt}, \kappa_{opt}, v_{opt}, \tau_{opt}^2)$  are hyperparameters maximizing  $E(l(\mathbf{y}, \mu, \sigma^2; \theta, \kappa, \tau^2, v) \mid \mathbf{y}, \theta_{t-1}, \kappa_{t-1}, \tau_{t-1}^2, v_{t-1})$

Set  $t = t + 1$

**end while**

---

**Estimating  $\theta$  and  $\kappa$**  By taking posterior expectation of the second term of equation (3), we can get

$$\begin{aligned} & \sum_{i=0}^m E(\log(p(\mu_i | \sigma_i^2, \theta, \kappa)) \mid \mathbf{y}, \theta_{t-1}, \kappa_{t-1}, \tau_{t-1}^2, v_{t-1}) \\ &= -\frac{\kappa}{2} \sum_{i=0}^m \left( \frac{1}{\kappa_{t-1} + n_i} + \frac{(\theta - \hat{\mu}_{i(t-1)})^2}{\tilde{\sigma}_{i(t-1)}^2} \right) - \frac{m+1}{2} \log(\kappa) + C \end{aligned}$$

where  $\tilde{\sigma}_{i(t-1)}^2$  and  $\hat{\mu}_{i(t-1)}$  are estimated  $\tilde{\sigma}_i^2$  and  $\mu_i$  given  $(\theta_{t-1}, \kappa_{t-1}, \tau_{t-1}^2, v_{t-1})$  (equation (1) and (2)), and C is a constant, which doesn't contain any hyperparameters.  $\sum_{i=0}^m E(\log(p(\mu_i | \sigma_i^2, \theta, \kappa)) \mid \mathbf{y}, \theta_{t-1}, \kappa_{t-1}, \tau_{t-1}^2, v_{t-1})$  can be

maximized by  $\theta_{opt}$  and  $\kappa_{opt}$ , which are

$$\begin{aligned}\theta_{opt} &= \sum_{i=0}^m \frac{\hat{\mu}_{i(t-1)}}{\tilde{\sigma}_{i(t-1)}^2} / \sum_{i=0}^m \frac{1}{\tilde{\sigma}_{i(t-1)}^2} \\ \kappa_{opt} &= (m+1) / \sum_{i=0}^m \left( \frac{1}{\kappa_{t-1} + n_i} + \frac{(\theta_{opt} - \hat{\mu}_{i(t-1)})^2}{\tilde{\sigma}_{i(t-1)}^2} \right)\end{aligned}$$

**Estimating  $\tau^2$  and  $v$**  By taking posterior expectation of the third term of equation (3), we can get

$$\begin{aligned}& \sum_{i=c,0,1,\dots,m} E(\log(p(\sigma_i^2 | \tau^2, v)) | \mathbf{y}, \theta_{t-1}, \kappa_{t-1}, \tau_{t-1}^2, v_{t-1}) \\ &= \frac{(m+2)v}{2} \log\left(\frac{v\tau^2}{2}\right) - \left(\frac{v}{2} + 1\right) \sum_{i=c,0,1,\dots,m} E(\log(\sigma_i^2) | \mathbf{y}, \theta_{t-1}, \kappa_{t-1}, \tau_{t-1}^2, v_{t-1}) - \\ & \quad \frac{\tau^2 v}{2} \sum_{i=c,0,1,\dots,m} E\left(\frac{1}{\sigma_i^2} | \mathbf{y}, \theta_{t-1}, \kappa_{t-1}, \tau_{t-1}^2, v_{t-1}\right) - (m+2) \log\left(\Gamma\left(\frac{v}{2}\right)\right) \\ &= \frac{(m+2)v}{2} \log\left(\frac{v\tau^2}{2}\right) - \left(\frac{v}{2} + 1\right) \sum_{i=c,0,1,\dots,m} \left(\log\left(\frac{(v_{t-1} + n_i)\tilde{\sigma}_{i(t-1)}^2}{2}\right) - \psi\left(\frac{v_{t-1} + n_i}{2}\right)\right) - \\ & \quad \frac{\tau^2 v}{2} \sum_{i=c,0,1,\dots,m} \frac{1}{\tilde{\sigma}_{i(t-1)}^2} - (m+2) \log\left(\Gamma\left(\frac{v}{2}\right)\right)\end{aligned}$$

where  $\Gamma(\cdot)$  is gamma function and  $\psi(\cdot)$  is digamma function.

By setting

$$\begin{cases} \frac{\partial}{\partial \tau^2} \sum_{i=c,0,1,\dots,m} E(\log(p(\sigma_i^2|\tau^2, v)) | \mathbf{y}, \theta_{t-1}, \kappa_{t-1}, \tau_{t-1}^2, v_{t-1}) = 0 \\ \frac{\partial}{\partial v} \sum_{i=c,0,1,\dots,m} E(\log(p(\sigma_i^2|\tau^2, v)) | \mathbf{y}, \theta_{t-1}, \kappa_{t-1}, \tau_{t-1}^2, v_{t-1}) = 0 \end{cases}$$

we got

$$\begin{cases} \frac{(m+2)v}{2\tau^2} - \frac{v}{2} \sum_{i=c,0,1,\dots,m} \frac{1}{\tilde{\sigma}_{i(t-1)}^2} = 0 \\ (m+2) \left( \log\left(\frac{v}{2}\right) + \log(\tau^2) - \psi\left(\frac{v}{2}\right) \right) - \sum_{i=c,0,1,\dots,m} \left( \log\left(\frac{(v_{t-1}+n_i)\tilde{\sigma}_{i(t-1)}^2}{2}\right) - \psi\left(\frac{v_{t-1}+n_i}{2}\right) \right) = 0 \end{cases}$$

we got close form solution of the above equations by using approximation

of digamma function, which is  $\psi\left(\frac{v}{2}\right) \approx \log\left(\frac{v}{2}\right) - \frac{1}{v} - \frac{1}{3v^2}$ .

$$\begin{aligned} \tau_{opt}^2 &= \frac{m+2}{\sum_{i=c,0,1,\dots,m} \frac{1}{\tilde{\sigma}_{i(t-1)}^2}} \\ v_{opt} &= \frac{2}{3\left(\sqrt{1 + \frac{4}{3}T} - 1\right)} \end{aligned}$$

where  $T = \frac{1}{m+2} \sum_{i=c,0,1,\dots,m} \left( \log\left(\frac{(v_{t-1}+n_i)\tilde{\sigma}_{i(t-1)}^2}{2}\right) - \psi\left(\frac{v_{t-1}+n_i}{2}\right) \right) - \log(\tau_{opt}^2)$ .

## Hyperparameters estimation for null model

For hierarchical model with control data, we denote pooled Box-Cox transformed IPD of native and control data as  $\mathbf{y}_p$  (i.e.  $(y_{c1}, y_{c2}, \dots, y_{cn_c}, y_{01}, y_{02}, \dots, y_{0n_0})$ ).

For hierarchical model without control data, we simply let  $\mathbf{y}_c$ , Box-Cox transformed IPD of native sample, equal to  $\mathbf{y}_p$ , because it is a special case of



hierarchical model with control data, in which  $y_0$  is empty. We assume  $\mathbf{y}_p$  follows a normal distribution

$$\mathbf{y}_p \sim N(\mu_p, \sigma_p^2)$$

and  $(\mu_p, \sigma_p^2), (\mu_1, \sigma_1^2), (\mu_2, \sigma_2^2), \dots, (\mu_m, \sigma_m^2)$  have the same prior distribution, which is

$$p(\sigma_i^2 | v, \tau^2) = \text{scaled inverse} - \chi^2(v, \tau^2)$$

$$p(\mu_i | \sigma_i^2, \theta, \kappa) = N\left(\theta, \frac{\sigma_i^2}{\kappa}\right)$$

where,  $i = p, 1, \dots, m$ . posterior distribution of  $\mu_i$  and  $\sigma_i^2$ ,  $i = p, 1, \dots, m$ , are

$$p(\mu_i | \mathbf{y}_i, \sigma_i^2, \theta, \kappa) = N\left(\frac{\kappa}{\kappa + n_i}\theta + \frac{n_i}{\kappa + n_i}\bar{y}_i, \frac{\sigma_i^2}{\kappa + n_i}\right)$$

$$p(\sigma_i^2 | \mathbf{y}_i, v, \tau^2) = \text{scaled inverse} - \chi^2(v + n_i, \tilde{\sigma}_i^2)$$

where

$$\tilde{\sigma}_i^2 = \frac{1}{v + n_i} \left( v\tau^2 + (n_i - 1)s_i^2 + \frac{\kappa n_i}{\kappa + n_i} (\bar{y}_i - \theta)^2 \right)$$

[1]. We used posterior expectations of  $\mu_i$  and  $\sigma_i^2$  as their estimations, which are

$$\begin{aligned}\hat{\mu}_i &= E(\mu_i | \mathbf{y}_i, \theta, \kappa) = \frac{\kappa}{\kappa + n_i} \theta + \frac{n_i}{\kappa + n_i} \bar{y}_i \\ \hat{\sigma}_i^2 &= E(\sigma_i^2 | \mathbf{y}_i, v, \tau^2) = \frac{n_i + v}{n_i + v - 2} \tilde{\sigma}_i^2\end{aligned}$$

where  $i = p, 1, \dots, m$ . Like the previous section, we adopt a EM algorithm (Algorithm 1) to maximize marginal log-likelihood function  $L(\mathbf{y}_p, \mathbf{y}_1, \dots, \mathbf{y}_m; \theta, \kappa, v, \tau^2)$ .

In the EM procedure,  $\mu_i$  and  $\sigma_i^2$  were regarded as missing data, and the log-likelihood function with the complete data was

$$\begin{aligned}l(\mathbf{y}, \mu, \sigma^2; \theta, \kappa, \tau^2, v) \\ &= \log(p(\mathbf{y} | \mu, \sigma^2)) + \sum_{i=p,1,\dots,m} \log(p(\mu_i | \sigma_i^2, \theta, \kappa)) \\ &+ \sum_{i=p,1,\dots,m} \log(p(\sigma_i^2 | \tau^2, v))\end{aligned}\tag{4}$$

where  $\mathbf{y} = (\mathbf{y}_p, \mathbf{y}_1, \dots, \mathbf{y}_m)$ ,  $\mu = (\mu_p, \mu_1, \dots, \mu_m)$  and  $\sigma^2 = (\sigma_p^2, \sigma_1^2, \dots, \sigma_m^2)$ .

**Estimating  $\theta$  and  $\kappa$**  By taking posterior expectation of the second term of equation (4), we can get

$$\begin{aligned} & \sum_{i=p,1,\dots,m} E(\log(p(\mu_i|\sigma_i^2, \theta, \kappa)) | \mathbf{y}, \theta_{t-1}, \kappa_{t-1}, \tau_{t-1}^2, v_{t-1}) \\ = & -\frac{\kappa}{2} \sum_{i=p,1,\dots,m} \left( \frac{1}{\kappa_{t-1} + n_i} + \frac{(\theta - \hat{\mu}_{i(t-1)})^2}{\tilde{\sigma}_{i(t-1)}^2} \right) - \frac{m+1}{2} \log(\kappa) + C \end{aligned}$$

Thus,  $\sum_{i=p,1,\dots,m} E(\log(p(\mu_i|\sigma_i^2, \theta, \kappa)) | \mathbf{y}, \theta_{t-1}, \kappa_{t-1}, \tau_{t-1}^2, v_{t-1})$  can be maximized by

$$\begin{aligned} \theta_{opt} &= \sum_{i=p,1,\dots,m} \frac{\hat{\mu}_{i(t-1)}}{\tilde{\sigma}_{i(t-1)}^2} / \sum_{i=0}^m \frac{1}{\tilde{\sigma}_{i(t-1)}^2} \\ \kappa_{opt} &= (m+1) / \sum_{i=p,1,\dots,m} \left( \frac{1}{\kappa_{t-1} + n_i} + \frac{(\theta_{opt} - \hat{\mu}_{i(t-1)})^2}{\tilde{\sigma}_{i(t-1)}^2} \right) \end{aligned}$$

**Estimating  $\tau^2$  and  $v$**  By taking posterior expectation of the third term of equation (4), we can get

$$\begin{aligned} & \sum_{i=p,1,\dots,m} E(\log(p(\sigma_i^2|\tau^2, v)) | \mathbf{y}, \theta_{t-1}, \kappa_{t-1}, \tau_{t-1}^2, v_{t-1}) \\ = & \frac{(m+1)v}{2} \log\left(\frac{v\tau^2}{2}\right) - \left(\frac{v}{2} + 1\right) \sum_{i=p,1,\dots,m} \left( \log\left(\frac{(v_{t-1} + n_i)\tilde{\sigma}_{i(t-1)}^2}{2}\right) - \psi\left(\frac{v_{t-1} + n_i}{2}\right) \right) - \\ & \frac{\tau^2 v}{2} \sum_{i=p,1,\dots,m} \frac{1}{\tilde{\sigma}_{i(t-1)}^2} - (m+1) \log\left(\Gamma\left(\frac{v}{2}\right)\right) \end{aligned} \quad (5)$$

By using approximation of digamma function, which is  $\psi(\frac{v}{2}) \approx \log(\frac{v}{2}) - \frac{1}{v} - \frac{1}{3v^2}$ , (5) can be maximized by

$$\begin{aligned}\tau_{opt}^2 &= \frac{m+1}{\sum_{i=p,1,\dots,m} \frac{1}{\tilde{\sigma}_{i(t-1)}^2}} \\ v_{opt} &= \frac{2}{3(\sqrt{1 + \frac{4}{3}T} - 1)}\end{aligned}$$

where  $T = \frac{1}{m+1} \sum_{i=p,1,\dots,m} \left( \log\left(\frac{(v_{t-1}+n_i)\tilde{\sigma}_{i(t-1)}^2}{2}\right) - \psi\left(\frac{v_{t-1}+n_i}{2}\right) \right) - \log(\tau_{opt}^2)$ .

## References

- [1] Gelman A, Carlin JB, Stern HS, Rubin DB (2003) Bayesian Data Analysis. Chapman and Hall/CRC, 2nd edition.
